# Supplementary material for: Sixteenth-century tomatoes in Europe: who saw them, what they looked like, and where they came from
Source: PeerJ. 2022 Jan 17;10:e12790. doi: 10.7717/peerj.12790 (PMC8772448; doi:10.7717/peerj.12790)
Supplement: Supplemental Information 1 [file peerj-10-12790-s001.xlsx]

## Sheet: Sheet1
Supplementary Table 1: All extant sixteen-century herbarium in Europe, with their locations, dates and link to tomato specimens if present.
Original name(s) of specimen	Herbarium maker	Herbarium's conventional name	Volume	Number	Origin of herbarium	Origin of specimen	Dating of herbarium	Dating of specimen	Description of specimen	Link to image	Location of herbarium	Remarks	Reference
-	Michelle Merini	Merini	-	-	Pisa, Italy	-	1540-1545	-	-	-	Natural History Museum, University of Florence (Italy)		Chiovenda (1927)
Pomum amoris. Mali insani species. Tembal quibusd.	Ulisse Aldrovandi	Aldrovandi	1	368	Bologna, Italy	not known	1551-1586	1551	Specimen with two flowers. One flower looks like having many petals?	http://137.204.21.141/ALDROVANDI/image/vol1fg368.JPG/Zoom?width=800px&height=800px. http://moro.imss.fi.it/aldrovandi/imagebrowse.asp?showframe=False&fileid=3516&compid=5281&complabel=Pomum+amoris%2E+Mali+insani+species%2E+Tembul+quibusd%2E%2E%2E%2E&shelfmark=Erbario+Aldrovandi+vol%2E+001	University of Bologna (Italy)		Soldano (2000)
-	Felix Platter	Platter	-	-	Basel, Switzerland	-	1552-1614	-	-	-	Burgerbibiliotek Bern (Switzerland)		https://platter.burgerbib.ch/
Malus insana. Mandragorae species. Poma amoris	Francesco Petrollini	Erbario B	3	722	Bologna. Italy	not known	prior to 1553 (starting date)	-	Short branch with several flowers and a small probably unripe fruit	-	Biblioteca Angelica, Rome (Italy)		Penzig (1905); Stefanaki et al. (2019).
-	Andrea Cesalpino	Cesalpino	-	-	Pisa, Italy	-	1555-1563	-	-	-	Natural History Museum, University of Florence (Italy)		Caruel (1858)
-	Jehan Girault	Girault	-	-	Lyon, France	-	1558	-	-	-	Muséum national d'Histoire naturelle, Paris (France)		https://www.mnhn.fr/fr/collections/ensembles-collections/botanique/herbiers-historiques/herbier-jehan-girault
Puma [sic!] Amoris	Francesco Petrollini	En Tibi	-	294	Bologna, Italy	not known	c. 1558	-	Specimen with two flowers and (skin of) a fruit. The number of petals seem normal.	https://bioportal.naturalis.nl/multimedia/L.2111092_2107853030/theme=en_tibi&sort=identifications.scientificName.genusOrMonomial%2Cidentifications.scientificName.specificEpithet%2Cidentifications.scientificName.infraspecificEpithet&sortDirection=asc%2Casc%2Casc&from=412	Naturalis Bidoiversity Center, Leiden (The Netherlands)		Stefanaki et al. (2018)
Poma aurea	Leonhard Rauwolf	Rauwolf	3	19	S. France and N. Italy	N. Italy	1560-1563	1563	Flowering specimen, flower don't have multiple petals.	https://drive.google.com/drive/u/1/folders/0B_JehDQDPPQOWEdsOVZ5U2g1V1k	Naturalis Bidoiversity Center, Leiden (The Netherlands)		Stefanaki et al. (2021)
-	Petrus Cadé	Cade herbarium	-	-	Brabant, the Netherlands	-	1566	-	-	-	Naturalis Bidoiversity Center, Leiden (The Netherlands)		http://www.nationaalherbarium.nl/Cade/
Pomi di Ettiopia ouer Pomi d’oro	Unknown	Erbario Ducale Estense	-	142	Ferrara, Italy	not known	1570-1598	-	flowering specimen.	https://www.asmo.beniculturali.it/index.php?eID=tx_cms_showpic&file=1891&md5=5f65773f4d21850cdd3b0ccd1693e711e9c19e52&parameters%5B0%5D=YTo0OntzOjU6IndpZHRoIjtzOjQ6IjgwMG0iO3M6NjoiaGVpZ2h0IjtzOjQ6IjYw&parameters%5B1%5D=MG0iO3M6NzoiYm9keVRhZyI7czo0MToiPGJvZHkgc3R5bGU9Im1hcmdpbjowOyBi&parameters%5B2%5D=YWNrZ3JvdW5kOiNmZmY7Ij4iO3M6NDoid3JhcCI7czozNzoiPGEgaHJlZj0iamF2&parameters%5B3%5D=YXNjcmlwdDpjbG…			Camus & Penzig (1885)
Solanum; Poma amoris. Marinum. alii. poma amoris. Portugalischer nachtschatt	Hieronymus Harder	Herbarium vivum	-	141	Ulm, Germany	not known	1576–1594	-	Flowering specimen with drawn red and yellow fruits and root.	https://daten.digitale-sammlungen.de/0001/bsb00011834/images/index.html?id=00011834&groesser=&fip=193.174.98.30&no=&seite=303	Bayerische Staatsbibliothek, München		https://bildsuche.digitale-sammlungen.de/index.html?c=band_segmente&bandnummer=bsb00011834&pimage=00001&l=de
Solanum pomiferum fructu molli C.B. Aurea mala, Dodo. Poma amoris Lob. Cam. apud Matth. Tab. Basileae ex horto.	Caspar Bauhin	Bauhin	B15	B15-075.2A	Basel, Switzerland	Hortus Basel?	1577-1624	-	specimen with a flower	https://herbarium.unibas.ch/index.php/de/database-search/advanced-search?col=BAUHIN&SearchResultID=B15-075.2A	University of Basel (Switzerland)		https://herbarium.unibas.ch/index.php/de/herbaria#bauhin
Solanum pomiferum fructu rotundo striato molli, C. Bauh. Lycopersicon Galeni, Anguillar. Poma amoris, Dod. gal. Lob. Tab. 403. 2. ex hortulo nostro.	Caspar Bauhin	Bauhin	B15	B15-075.2B_1	Basel, Switzerland	Hortus Basel?	1577-1624	-	A specimen with leaves and flowers and two flowering stalks. Multiple-petaled flowers?	https://herbarium.unibas.ch/index.php/de/database-search/advanced-search?col=BAUHIN&SearchResultID=B15-075.2B_1	University of Basel (Switzerland)		https://herbarium.unibas.ch/index.php/de/herbaria#bauhin
Solanum pomiferum fructu rotundo striato molli, C. Bauh. Lycopersicon Galeni, Anguillar. Poma amoris, Dod. gal. Lob. Tab. 403. 2. ex hortulo nostro.	Caspar Bauhin	Bauhin	B15	B15-075.2B_2	Basel, Switzerland	Hortus Basel?	1577-1624	-	A flowering specimen	https://herbarium.unibas.ch/index.php/de/database-search/advanced-search?col=BAUHIN&SearchResultID=B15-075.2B_2	University of Basel (Switzerland)		https://herbarium.unibas.ch/index.php/de/herbaria#bauhin
Pomidoria, Poma aurea. Lieboepffel, Goldoepffel.	Caspar Ratzenberger	Ratzenberger	3	490	Kassel, Germany	not known	1592	-	-	-	Naturkundemuseum, Kassel		Kessler (1870); http://mdz-nbn-resolving.de/urn:nbn:de:bvb:12-bsb11018583-2
-	Hieronymus Harder	Linzer Herbarium	-	-	Ulm, Germany	-	c. 1599	-	-	-	Bayerische Staatsbibliothek, München		Speta & Grims (1980)
