# Supplementary material for: Sixteenth-century tomatoes in Europe: who saw them, what they looked like, and where they came from
Source: PeerJ journal article supplement (doi:10.7717/peerj.12790), 2022-01-17
Supplement: Supplementary_Figure_2.pdf [file Supplementary_Figure_2.pdf]

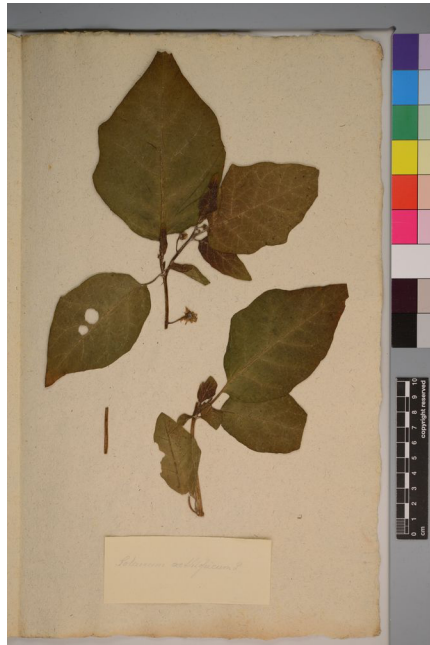

*Salix purpurea*
